# Supplementary material for: Association of the Expiration of Child Tax Credit Advance Payments With Food Insufficiency in US Households
Source: PubMed Central journal article supplement (PMC9587477; doi:10.1001/jamanetworkopen.2022.34438), 2022-10-21
Supplement: jamanetwopen-e2234438-s001.pdf [file jamanetwopen-e2234438-s001.pdf]

## Supplemental Online Content

Bovell-Ammon A, McCann NC, Mulugeta M, Ettinger de Cuba S, Raifman J, Shafer P. Association of the expiration of Child Tax Credit advance payments with food insufficiency in US households. *JAMA Netw Open*. 2022;5(10):e2234438. doi:10.1001/jamanetworkopen.2022.34438

**eTable 1.** Implications of ARPA Changes to the CTC

**eTable 2.** Statistical Test of Parallel Trends in Household Food Insufficiency Between Households With and Without Children Present in the Period Prior to Advance Child Tax Credit Payment Expiration (July 21, 2021, through January 10, 2021)

**eTable 3.** Household Food Insufficiency Overall and by Subgroup and Presence of Children in the Household, Census Bureau Household Pulse Survey, July 2021 to July 2022

**eTable 4.** Difference-in-Difference Estimates of Expiration of Advance Child Tax Credit Payments on Household Food Insufficiency

**eTable 5.** Difference-in-Difference Estimates of Expiration of Advance Child Tax Credit Payments on Household Food Insufficiency: Coefficients for Post CTC Expiration × Presence of Children by Subgroup

**eTable 6.** Event Study Coefficients for Survey Wave × Presence of Children in Household Interaction: Alternative Model Specifications

This supplemental material has been provided by the authors to give readers additional information about their work.

**eTable 1. Implications of ARPA Changes to the CTC**

| Pre-ARPA Structure of the CTC                         | ARPA change to the CTC                                             | Implication                                                                                                                                                                                                                                                                  |
|-------------------------------------------------------|--------------------------------------------------------------------|------------------------------------------------------------------------------------------------------------------------------------------------------------------------------------------------------------------------------------------------------------------------------|
| Partially-refundable credit after \$2,500 of earnings | Fully refundable credit beginning with \$0 in earnings             | Pre-ARPA expansion of the CTC, one-third of children lived in households with incomes too low to claim the full CTC. The ARPA expansion made the full value of the credit available to these households without changing phase-out eligibility for higher income households. |
| \$2,000 per child 0-16 annually                       | \$3,600 per child 0-<6 annually<br>\$3,000 per child 6-17 annually | ARPA boosted the value of the credit for all children, created a higher value credit for young children, and increased age eligibility to age 17.                                                                                                                            |
| Lump sum, once per year payment at tax filing         | Advance monthly payment for 6 months                               | ARPA enabled half of the value of the CTC to be paid in advance, monthly installments between July-December 2021. The remainder of the credit could be claimed by taxpayers filing their 2021 tax returns.                                                                   |

**eTable 2.** Statistical Test of Parallel Trends in Household Food Insufficiency Between Households With and Without Children Present in the Period Prior to Advance Child Tax Credit Payment Expiration (July 21, 2021, through January 10, 2021)

|                                                           | <b>Naïve model</b>          |                | <b>Fully-adjusted Model</b> |                |
|-----------------------------------------------------------|-----------------------------|----------------|-----------------------------|----------------|
|                                                           | <i>Coefficient (95% CI)</i> | <i>P-value</i> | <i>Coefficient (95% CI)</i> | <i>P-value</i> |
| Presence of children x continuous time variable indicator | 0.001 (-0.001, 0.003)       | .238           | 0.0004 (-0.001, 0.002)      | .657           |

Weighted using household survey weights divided by number of waves

Fully adjusted model controls for age, sex at birth, race/ethnicity, education level, number of adults in household, number of children in household, annual household income, employment in last 7 days, use of unemployment insurance for spending/funds, use of Economic Impact Payments for spending/funds, Supplemental Nutrition Assistance Program participation, receipt of food aid, health insurance coverage, and state fixed effects

Source: Authors' analysis of Household Pulse Survey data from the Census Bureau, July 2021 to July 2022

**eTable 3.** Household Food Insecurity Overall and by Subgroup and Presence of Children in the Household, Census Bureau Household Pulse Survey, July 2021 to July 2022

| Sample, %<br>(95% CI)     | 7/21-<br>8/2            | 8/4-<br>8/16            | 8/18-<br>8/30           | 9/1-<br>9/13            | 9/15-<br>9/27           | 9/29-<br>10/11          | 12/1-<br>12/13          | 12/29/2<br>1-<br>1/10/22 | 1/26-<br>2/7            | 3/2-<br>3/14            | 3/30-<br>4/11           | 4/27-<br>5/9            | 6/1-<br>6/13            | 6/29-<br>7/11           |
|---------------------------|-------------------------|-------------------------|-------------------------|-------------------------|-------------------------|-------------------------|-------------------------|--------------------------|-------------------------|-------------------------|-------------------------|-------------------------|-------------------------|-------------------------|
| Full sample               |                         |                         |                         |                         |                         |                         |                         |                          |                         |                         |                         |                         |                         |                         |
| Overall                   | 9.6<br>(9.0,<br>10.2)   | 9.5<br>(8.8,<br>10.1)   | 9.7<br>(9.1,<br>10.3)   | 9.9<br>(9.2,<br>10.6)   | 10.5<br>(9.8,<br>11.2)  | 10.7<br>(10.0,<br>11.2) | 11.0<br>(10.3,<br>11.6) | 11.8<br>(11.2,<br>12.4)  | 11.7<br>(11.1,<br>12.3) | 11.7<br>(11.2,<br>12.3) | 13.0<br>(12.3,<br>13.7) | 13.2<br>(12.5,<br>14.0) | 12.7<br>(11.9,<br>13.4) | 13.3<br>(12.6,<br>14.0) |
| Low-income                | 22.8<br>(21.0,<br>24.7) | 24.5<br>(22.5,<br>26.5) | 23.0<br>(21.2,<br>24.8) | 22.3<br>(20.4,<br>24.3) | 24.5<br>(22.4,<br>26.6) | 25.0<br>(23.0,<br>26.9) | 24.5<br>(22.7,<br>26.2) | 25.5<br>(23.9,<br>27.0)  | 25.2<br>(23.5,<br>26.8) | 24.7<br>(23.2,<br>26.3) | 28.1<br>(26.1,<br>30.1) | 29.0<br>(27.0,<br>31.1) | 28.3<br>(26.0,<br>30.5) | 30.9<br>(28.8,<br>32.9) |
| Single-adult              | 13.2<br>(11.7,<br>14.8) | 15.6<br>(13.8,<br>17.4) | 13.2<br>(11.9,<br>14.5) | 12.3<br>(10.8,<br>13.9) | 13.2<br>(11.5,<br>15.0) | 15.9<br>(14.1,<br>17.6) | 14.7<br>(13.2,<br>16.2) | 16.1<br>(14.7,<br>17.5)  | 15.2<br>(13.8,<br>16.6) | 16.1<br>(14.7,<br>17.5) | 17.7<br>(16.0,<br>19.3) | 18.6<br>(16.7-<br>20.4) | 17.8<br>(15.8,<br>19.8) | 17.0<br>(15.4,<br>18.6) |
| Non-Hispanic<br>White     | 7.1<br>(6.5,<br>7.7)    | 7.0<br>(6.5,<br>7.6)    | 7.3<br>(6.8,<br>7.9)    | 7.3<br>(6.7,<br>8.0)    | 7.7<br>(7.0,<br>8.3)    | 7.4<br>(6.8,<br>8.1)    | 8.4<br>(7.8,<br>9.1)    | 8.2<br>(7.7,<br>8.8)     | 8.6<br>(8.0,<br>9.2)    | 8.8<br>(8.2,<br>9.4)    | 9.3<br>(8.6,<br>9.9)    | 9.5<br>(8.8,<br>10.2)   | 9.1<br>(8.5,<br>9.7)    | 9.5<br>(8.8,<br>10.2)   |
| Hispanic                  | 12.0<br>(10.2,<br>13.9) | 13.8<br>(11.9,<br>15.8) | 13.7<br>(11.7,<br>15.7) | 15.2<br>(12.8,<br>17.6) | 16.0<br>(13.2,<br>18.8) | 16.7<br>(14.3,<br>19.1) | 15.7<br>(13.6,<br>17.9) | 19.1<br>(16.9,<br>21.3)  | 18.2<br>(16.1,<br>20.4) | 16.3<br>(14.5,<br>18.2) | 21.1<br>(18.2,<br>24.0) | 20.8<br>(18.1,<br>23.5) | 17.8<br>(15.0,<br>20.5) | 16.9<br>(14.8,<br>19.0) |
| Non-Hispanic<br>Black     | 19.1<br>(16.4,<br>21.8) | 17.8<br>(15.1,<br>20.5) | 17.7<br>(15.2,<br>20.2) | 16.2<br>(14.0,<br>18.4) | 19.9<br>(17.3,<br>24.5) | 19.2<br>(16.6,<br>21.9) | 18.6<br>(16.2,<br>21.1) | 20.8<br>(18.6,<br>23.0)  | 20.4<br>(18.1,<br>22.7) | 21.5<br>(19.4,<br>23.6) | 23.8<br>(21.1,<br>26.4) | 22.2<br>(19.7,<br>24.8) | 24.8<br>(21.8,<br>27.8) | 28.2<br>(25.4,<br>31.0) |
| Non-Hispanic<br>Asian     | 4.9<br>(2.7,<br>7.0)    | 3.5<br>(2.3,<br>4.7)    | 4.4<br>(2.6,<br>6.2)    | 4.4<br>(2.8,<br>5.9)    | 4.8<br>(3.0,<br>6.5)    | 4.3<br>(2.7,<br>6.0)    | 5.2<br>(3.5,<br>6.9)    | 5.8<br>(4.0,<br>7.6)     | 3.8<br>(2.7,<br>4.9)    | 3.9<br>(2.9,<br>5.0)    | 5.0<br>(3.1,<br>6.9)    | 5.6<br>(3.8,<br>7.5)    | 6.0<br>(4.2,<br>7.8)    | 5.9<br>(3.4,<br>8.4)    |
| Another<br>race/ethnicity | 15.1<br>(11.9,<br>18.3) | 11.9<br>(9.3,<br>14.5)  | 12.4<br>(9.9,<br>14.8)  | 16.6<br>(12.3,<br>20.9) | 12.6<br>(9.9,<br>15.2)  | 18.0<br>(14.7,<br>21.4) | 15.4<br>(12.4,<br>18.5) | 17.1<br>(14.3,<br>19.8)  | 17.9<br>(15.1,<br>20.7) | 18.5<br>(15.3,<br>21.7) | 17.8<br>(14.3,<br>21.3) | 22.7<br>(18.7,<br>26.7) | 17.4<br>(14.5,<br>20.3) | 19.4<br>(15.3,<br>23.4) |
| Households with children  |                         |                         |                         |                         |                         |                         |                         |                          |                         |                         |                         |                         |                         |                         |
| Overall                   | 9.9<br>(9.0,<br>10.9)   | 9.6<br>(8.8,<br>10.5)   | 10.8<br>(9.7,<br>11.8)  | 10.5<br>(9.4,<br>11.5)  | 10.8<br>(9.7,<br>11.9)  | 11.0<br>(9.9,<br>12.1)  | 11.9<br>(10.9,<br>13.0) | 12.7<br>(11.8,<br>13.7)  | 13.6<br>(12.6,<br>14.6) | 13.4<br>(12.5,<br>14.3) | 14.5<br>(13.2,<br>15.8) | 15.2<br>(14.0,<br>16.4) | 14.8<br>(13.6,<br>16.0) | 16.0<br>(14.8,<br>17.2) |

|                             |                         |                         |                         |                         |                         |                         |                         |                         |                         |                         |                         |                         |                         |                         |
|-----------------------------|-------------------------|-------------------------|-------------------------|-------------------------|-------------------------|-------------------------|-------------------------|-------------------------|-------------------------|-------------------------|-------------------------|-------------------------|-------------------------|-------------------------|
| Low-income                  | 21.6<br>(18.4,<br>24.8) | 23.4<br>(20.5,<br>26.3) | 24.6<br>(21.3,<br>27.9) | 22.3<br>(19.3,<br>25.2) | 24.8<br>(21.6,<br>28.0) | 24.4<br>(21.0,<br>27.8) | 25.3<br>(22.3,<br>28.2) | 27.9<br>(25.3,<br>30.5) | 29.6<br>(26.7,<br>32.4) | 27.6<br>(24.9,<br>30.3) | 31.9<br>(28.2,<br>35.6) | 33.1<br>(29.4,<br>36.8) | 32.7<br>(28.9,<br>36.4) | 34.8<br>(31.4,<br>38.2) |
| Single-adult                | 16.5<br>(13.0,<br>20.0) | 18.6<br>(15.5,<br>21.7) | 17.6<br>(14.7,<br>20.5) | 14.0<br>(11.5,<br>16.4) | 15.7<br>(12.7,<br>18.6) | 15.9<br>(12.7,<br>19.1) | 17.6<br>(14.5,<br>20.7) | 20.0<br>(17.2,<br>22.8) | 22.0<br>(18.8,<br>25.2) | 21.1<br>(18.3,<br>23.8) | 22.0<br>(18.6,<br>25.4) | 25.2<br>(21.1,<br>29.2) | 23.0<br>(20.0,<br>26.1) | 22.0<br>(18.8,<br>25.1) |
| Non-Hispanic<br>White       | 6.5<br>(5.7,<br>7.4)    | 6.8<br>(5.9,<br>7.8)    | 7.2<br>(6.3,<br>8.2)    | 6.2<br>(5.4,<br>7.0)    | 6.9<br>(6.0,<br>7.8)    | 7.3<br>(6.2,<br>8.4)    | 7.5<br>(6.5,<br>8.5)    | 8.4<br>(7.4,<br>9.4)    | 9.6<br>(8.6,<br>10.6)   | 9.2<br>(8.2,<br>10.2)   | 9.1<br>(8.0,<br>10.2)   | 9.6<br>(8.4,<br>10.8)   | 9.8<br>(8.7,<br>10.9)   | 10.4<br>(9.1,<br>11.7)  |
| Hispanic                    | 12.3<br>(9.6,<br>15.0)  | 13.7<br>(11.2,<br>16.3) | 15.8<br>(12.5,<br>19.0) | 17.6<br>(14.1,<br>21.2) | 16.9<br>(12.9,<br>20.9) | 16.7<br>(13.2,<br>20.1) | 17.0<br>(14.0,<br>19.9) | 18.6<br>(15.8,<br>21.4) | 19.0<br>(16.2,<br>21.8) | 18.5<br>(15.8,<br>21.1) | 25.4<br>(20.6,<br>30.2) | 23.5<br>(19.5,<br>27.4) | 19.5<br>(16.3,<br>22.7) | 20.7<br>(17.5,<br>24.0) |
| Non-Hispanic<br>Black       | 21.1<br>(17.2,<br>25.0) | 16.8<br>(13.9,<br>19.7) | 19.5<br>(15.4,<br>23.6) | 18.4<br>(15.1,<br>21.6) | 20.8<br>(17.4,<br>24.1) | 19.5<br>(15.6,<br>23.4) | 23.8<br>(19.9,<br>27.7) | 21.1<br>(18.1,<br>24.1) | 24.0<br>(20.3,<br>27.7) | 23.3<br>(20.3,<br>26.3) | 25.4<br>(21.6,<br>29.2) | 27.2<br>(23.3,<br>31.1) | 28.5<br>(23.8,<br>33.3) | 33.8<br>(29.7,<br>37.9) |
| Non-Hispanic<br>Asian       | 3.5<br>(1.9,<br>5.0)    | 3.9<br>(1.9,<br>6.0)    | 4.7<br>(1.3,<br>8.2)    | 3.8<br>(1.9,<br>5.6)    | 4.8<br>(2.4,<br>7.3)    | 5.0<br>(1.9,<br>8.1)    | 4.7<br>(2.5,<br>6.8)    | 7.4<br>(4.1,<br>10.8)   | 4.0<br>(2.3,<br>5.6)    | 4.9<br>(3.1,<br>6.7)    | 6.2<br>(2.6,<br>9.9)    | 6.3<br>(3.8,<br>8.8)    | 7.8<br>(4.7,<br>10.9)   | 6.4<br>(2.7,<br>10.0)   |
| Another<br>race/ethnicity   | 16.6<br>(11.3,<br>21.9) | 12.1<br>(8.3,<br>15.9)  | 13.2<br>(9.7,<br>16.7)  | 15.6<br>(7.6,<br>23.5)  | 11.9<br>(7.7,<br>16.1)  | 15.9<br>(11.7,<br>20.1) | 15.7<br>(10.8,<br>20.7) | 17.0<br>(13.6,<br>20.5) | 18.9<br>(14.5,<br>23.3) | 19.6<br>(15.1,<br>24.2) | 15.6<br>(11.3,<br>20.0) | 24.1<br>(18.5,<br>29.7) | 21.6<br>(16.6,<br>26.5) | 18.2<br>(13.3,<br>23.1) |
| Households without children |                         |                         |                         |                         |                         |                         |                         |                         |                         |                         |                         |                         |                         |                         |
| Overall                     | 9.3<br>(8.5,<br>10.1)   | 9.3<br>(8.50,<br>10.2)  | 8.9<br>(8.2,<br>9.5)    | 9.5<br>(8.6,<br>10.3)   | 10.3<br>(9.4,<br>11.3)  | 10.4<br>(9.5,<br>11.2)  | 10.3<br>(9.5,<br>11.0)  | 11.1<br>(10.3,<br>11.8) | 10.4<br>(9.6,<br>11.1)  | 10.5<br>(9.8,<br>11.2)  | 12.0<br>(11.1,<br>12.8) | 11.9<br>(11.0,<br>12.8) | 11.2<br>(10.2,<br>12.1) | 11.5<br>(10.6,<br>12.3) |
| Low-income                  | 23.6<br>(21.3,<br>26.0) | 25.2<br>(22.6,<br>27.9) | 22.0<br>(20.0,<br>24.0) | 22.4<br>(19.8,<br>24.9) | 24.4<br>(21.6,<br>27.1) | 25.3<br>(23.0,<br>27.7) | 23.9<br>(21.7,<br>26.1) | 23.9<br>(21.9,<br>25.9) | 22.4<br>(20.4,<br>24.4) | 22.9<br>(21.0,<br>24.8) | 26.0<br>(23.7,<br>28.2) | 26.9<br>(24.4,<br>29.4) | 25.7<br>(22.8,<br>28.5) | 28.6<br>(26.1,<br>31.2) |
| Single-adult                | 11.9<br>(10.2,<br>13.6) | 14.2<br>(11.9,<br>16.4) | 11.5<br>(10.1,<br>12.8) | 11.7<br>(9.7,<br>13.6)  | 12.2<br>(10.0,<br>14.3) | 15.9<br>(13.8,<br>18.0) | 13.6<br>(12.0,<br>15.3) | 14.5<br>(12.9,<br>16.1) | 12.5<br>(11.1,<br>14.0) | 14.1<br>(12.5,<br>15.7) | 16.0<br>(14.2,<br>17.8) | 15.9<br>(14.0,<br>17.9) | 15.8<br>(13.2,<br>18.3) | 15.1<br>(13.3,<br>16.9) |
| Non-Hispanic<br>White       | 7.4<br>(6.6,<br>8.2)    | 7.2<br>(6.4,<br>7.9)    | 7.4<br>(6.7,<br>8.1)    | 8.0<br>(7.1,<br>9.0)    | 8.1<br>(7.2,<br>9.0)    | 7.6<br>(6.8,<br>8.3)    | 9.0<br>(8.2,<br>9.8)    | 8.1<br>(7.4,<br>8.8)    | 8.0<br>(7.3,<br>8.7)    | 8.6<br>(7.8,<br>9.3)    | 9.3<br>(8.5,<br>10.2)   | 9.4<br>(8.5,<br>10.4)   | 8.7<br>(7.9,<br>9.5)    | 9.0<br>(8.1,<br>9.78)   |

|                           |                         |                         |                         |                         |                         |                         |                         |                         |                         |                         |                         |                         |                         |                         |
|---------------------------|-------------------------|-------------------------|-------------------------|-------------------------|-------------------------|-------------------------|-------------------------|-------------------------|-------------------------|-------------------------|-------------------------|-------------------------|-------------------------|-------------------------|
| Hispanic                  | 11.8<br>(9.4,<br>14.2)  | 14.0<br>(11.0,<br>16.9) | 11.5<br>(9.3,<br>13.7)  | 12.7<br>(9.5,<br>16.0)  | 15.0<br>(11.1,<br>18.9) | 16.7<br>(13.4,<br>20.0) | 14.2<br>(11.1,<br>17.3) | 19.7<br>(16.2,<br>23.1) | 17.4<br>(14.1,<br>20.8) | 14.0<br>(11.5,<br>16.5) | 17.0<br>(14.0,<br>20.1) | 18.3<br>(14.7,<br>21.9) | 16.0<br>(11.5,<br>20.6) | 13.4<br>(10.7,<br>16.1) |
| Non-Hispanic<br>Black     | 17.3<br>(13.6,<br>21.0) | 18.7<br>(14.3,<br>23.1) | 16.1<br>(13.2,<br>18.9) | 14.0<br>(11.1,<br>16.8) | 19.2<br>(15.3,<br>23.0) | 19.0<br>(15.4,<br>22.5) | 14.1<br>(11.2,<br>17.0) | 20.5<br>(17.3,<br>23.7) | 17.0<br>(14.2,<br>19.8) | 19.7<br>(16.7,<br>22.7) | 22.5<br>(18.8,<br>26.1) | 18.1<br>(14.6,<br>21.5) | 21.3<br>(17.7,<br>25.0) | 23.2<br>(19.6,<br>26.8) |
| Non-Hispanic<br>Asian     | 6.0<br>(2.3,<br>9.8)    | 3.1<br>(1.7,<br>4.5)    | 4.1<br>(2.4,<br>5.9)    | 4.9<br>(2.5,<br>7.3)    | 4.7<br>(2.2,<br>7.2)    | 3.8<br>(2.3,<br>5.3)    | 5.6<br>(3.2,<br>8.1)    | 4.3<br>(2.7,<br>5.8)    | 3.6<br>(2.1,<br>5.2)    | 3.2<br>(1.9,<br>4.5)    | 4.0<br>(2.4,<br>5.5)    | 5.1<br>(2.5,<br>7.7)    | 4.6<br>(2.5,<br>6.6)    | 5.6<br>(2.1,<br>9.0)    |
| Another<br>race/ethnicity | 14.0<br>(10.0,<br>18.0) | 11.7<br>(8.2,<br>15.2)  | 11.6<br>(8.2,<br>15.1)  | 17.5<br>(13.3,<br>21.8) | 13.1<br>(9.7,<br>16.4)  | 20.0<br>(14.9,<br>25.1) | 15.1<br>(11.4,<br>18.9) | 17.1<br>(13.0,<br>21.2) | 17.1<br>(13.5,<br>20.8) | 17.7<br>(13.2,<br>22.2) | 19.4<br>(14.3,<br>24.5) | 21.7<br>(16.1,<br>27.3) | 14.4<br>(11.0,<br>17.9) | 20.1<br>(14.3,<br>26.0) |

Weighted using household survey weights divided by number of waves

Source: Authors' analysis of Household Pulse Survey data from the Census Bureau, July 2021 to July 2022

**eTable 4.** Difference-in-Difference Estimates of Expiration of Advance Child Tax Credit Payments on Household Food Insufficiency

| <b>Characteristic</b>                                     | <i>Coefficient<br/>(95% confidence interval)</i> | <i>P-value</i> |
|-----------------------------------------------------------|--------------------------------------------------|----------------|
| Post-period indicator                                     | 0.034 (0.025, -0.043)                            | <.001          |
| Presence of children in household indicator               | 0.007 (-0.001, -0.014)                           | .090           |
| Post period x presence of children in household indicator | 0.022 (0.016, -0.029)                            | <.001          |
| Sex at birth                                              |                                                  |                |
| Female                                                    | 0.002 (-0.001, -0.005)                           | .234           |
| Male                                                      | 0 [reference]                                    | NA             |
| Age group                                                 |                                                  |                |
| 18-24 years of age                                        | 0 [reference]                                    | NA             |
| 25-44 years of age                                        | 0.040 (0.032, -0.049)                            | <.001          |
| 45-64 years of age                                        | 0.019 (0.011, -0.027)                            | <.001          |
| Race/ethnicity                                            |                                                  |                |
| Non-Hispanic White                                        | 0 [reference]                                    | NA             |
| Hispanic                                                  | 0.018 (0.012, -0.024)                            | <.001          |
| Non-Hispanic Black                                        | 0.058 (0.051, -0.065)                            | <.001          |
| Non-Hispanic Asian                                        | -0.012 (-0.017, -0.007)                          | <.001          |
| Another race/ethnicity                                    | 0.044 (0.035, -0.053)                            | <.001          |
| Education                                                 |                                                  |                |
| Less than high school                                     | 0 [reference]                                    | NA             |
| High school or equivalent                                 | -0.044 (-0.057, -0.031)                          | <.001          |
| Some college or 2-year degree                             | -0.065 (-0.077, -0.052)                          | <.001          |
| 4-year degree or more                                     | -0.100 (-0.112, -0.088)                          | <.001          |
| Marital status                                            |                                                  |                |
| Married                                                   | -0.026 (-0.031, -0.022)                          | <.001          |
| Not married                                               | 0 [reference]                                    | NA             |
| Health insurance coverage                                 |                                                  |                |
| Uninsured                                                 | 0 [reference]                                    | NA             |
| Public                                                    | -0.036 (-0.046, -0.026)                          | <.001          |
| Private                                                   | -0.067 (-0.074, -0.060)                          | <.001          |
| Respondent employed in the last 7 days                    | -0.040 (-0.044, -0.036)                          | <.001          |

|                                                                                                        |                         |       |
|--------------------------------------------------------------------------------------------------------|-------------------------|-------|
| Report of unemployment insurance benefits as spending source in the last 7 days                        | 0.016 (0.004, 0.029)    | .008  |
| Current participation in Supplemental Nutrition Assistance Program benefits by anyone in the household | -0.001 (-0.009, 0.007)  | .817  |
| Receipt of food aid in the last 7 days by anyone in the household                                      | 0.148 (0.137, 0.160)    | <.001 |
| Report of Economic Impact Payment as spending source in the last 7 days                                | 0.012 (0.006, 0.019)    | <.001 |
| Number of adults in household                                                                          |                         |       |
| 1                                                                                                      | 0 [reference]           | NA    |
| 2                                                                                                      | -0.0004 (-0.006, 0.005) | .876  |
| 3 or more                                                                                              | 0.009 (0.003, 0.015)    | .003  |
| Number of children in household                                                                        |                         |       |
| 0                                                                                                      | 0 [reference]           | NA    |
| 1                                                                                                      | -0.009 (-0.016, -0.001) | .021  |
| 2                                                                                                      | -0.008 (-0.016, 0.0003) | .058  |
| 3 or more                                                                                              | 0 [omitted]             | NA    |
| Household income                                                                                       |                         |       |
| <\$25,000                                                                                              | 0 [reference]           | NA    |
| \$25,000-34,999                                                                                        | -0.068 (-0.078, -0.058) | <.001 |
| \$35,000-49,999                                                                                        | -0.101 (-0.110, -0.092) | <.001 |
| \$50,000-74,999                                                                                        | -0.141 (-0.150, -0.133) | <.001 |
| \$75,000-149,999                                                                                       | -0.162 (-0.171, -0.154) | <.001 |
| >=\$150,000                                                                                            | -0.156 (-0.165, -0.148) | <.001 |
| Missing                                                                                                | -0.116 (-0.126, -0.107) | <.001 |

Model also includes state and survey wave fixed effects and a constant term, weighted using household survey weights divided by the number of waves

Source: Authors' analysis of Household Pulse Survey data from the Census Bureau, July 2021 to July 2022



**eTable 5.** Difference-in-Difference Estimates of Expiration of Advance Child Tax Credit Payments on Household Food Insecurity: Coefficients for Post CTC Expiration × Presence of Children by Subgroup

| Characteristic: post CTC expiration indicator x presence of children in household interaction | Household food insufficiency |                 |
|-----------------------------------------------------------------------------------------------|------------------------------|-----------------|
|                                                                                               | Coefficient (95% CI)         | <i>P</i> -value |
| Main model: whole sample (N=592,044)                                                          | 0.022 (0.016, 0.029)         | <.001           |
| Low-income households (N=100,427)                                                             | 0.059 (0.038, 0.080)         | <.001           |
| Single-adult households (N=125,620)                                                           | 0.037 (0.018, 0.056)         | <.001           |
| Race/ethnicity: non-Hispanic White (N=425,497)                                                | 0.012 (0.006, 0.019)         | <.001           |
| Race/ethnicity: Hispanic (N=61,265)                                                           | 0.041 (0.017, 0.064)         | 0.001           |
| Race/ethnicity: non-Hispanic Black (N=46,704)                                                 | 0.039 (0.013, 0.065)         | 0.004           |
| Race/ethnicity: non-Hispanic Asian (N=34,118)                                                 | 0.013 (-0.005, 0.031)        | .146            |
| Race/ethnicity: other (N=24,460)                                                              | 0.017 (-0.016, 0.050)        | .304            |

Table reports coefficient of interest: the interaction between having children in the household and being in the period after CTC expiration (January 26<sup>th</sup> through July 11<sup>th</sup>, 2022). Full model results are not presented. Each model controls for the covariates age, sex at birth, race/ethnicity, education level, number of adults in household, number of children in household, annual household income, employment in last 7 days, use of unemployment insurance for spending/funds, use of Economic Impact Payments for spending/funds, Supplemental Nutrition Assistance Program participation, receipt of food aid, health insurance coverage, and state fixed effects

**eTable 6.** Event Study Coefficients for Survey Wave × Presence of Children in Household Interaction: Alternative Model Specifications

| Characteristic: survey wave x presence of children in household interaction | Household food insufficiency |         |
|-----------------------------------------------------------------------------|------------------------------|---------|
|                                                                             | Coefficient (95% CI)         | P-value |
| Main model                                                                  |                              |         |
| July 21 – August 2, 2021                                                    | -0.007 (-0.024, 0.009)       | .397    |
| August 4 – August 16, 2021                                                  | -0.006 (-0.022, 0.010)       | .448    |
| August 18 – August 30, 2021                                                 | 0.006 (-0.010, 0.022)        | .475    |
| September 1 – September 13, 2021                                            | -0.003 (-0.019, 0.014)       | .767    |
| September 15 – September 27, 2021                                           | -0.003 (-0.020, 0.014)       | .729    |
| September 29 – October 10, 2021                                             | -0.005 (-0.022, 0.012)       | .587    |
| December 1 – December 13, 2021                                              | -0.004 (-0.020, 0.013)       | .671    |
| December 29, 2021 – January 10, 2022                                        | 0 [reference]                | NA      |
| January 26 – February 7, 2022                                               | 0.015 (-0.001, 0.032)        | .064    |
| March 2 – March 14, 2022                                                    | 0.013 (-0.003, 0.028)        | .115    |
| March 30 – April 11, 2022                                                   | 0.014 (-0.004, 0.032)        | .122    |
| April 27 – May 9, 2022                                                      | 0.022 (0.004, 0.040)         | .017    |
| June 1 – June 13, 2022                                                      | 0.022 (0.004, 0.041)         | .016    |
| June 29 – July 11, 2022                                                     | 0.032 (0.014, 0.050)         | <.001   |
| Alternative model 1: clustered standard errors by state                     |                              |         |
| July 21 – August 2, 2021                                                    | -0.007 (-0.022, 0.008)       | .356    |
| August 4 – August 16, 2021                                                  | -0.006 (-0.019, 0.007)       | .353    |
| August 18 – August 30, 2021                                                 | 0.006 (-0.010, 0.021)        | .443    |
| September 1 – September 13, 2021                                            | -0.003 (-0.014, 0.009)       | .660    |
| September 15 – September 27, 2021                                           | -0.003 (-0.016, 0.009)       | .623    |
| September 29 – October 10, 2021                                             | -0.005 (-0.022, 0.013)       | .582    |
| December 1 – December 13, 2021                                              | -0.004 (-0.017, 0.009)       | .581    |
| December 29, 2021 – January 10, 2022                                        | 0 [reference]                | NA      |
| January 26 – February 7, 2022                                               | 0.015 (0.008, 0.023)         | <.001   |
| March 2 – March 14, 2022                                                    | 0.013 (-0.0004, 0.026)       | .057    |
| March 30 – April 11, 2022                                                   | 0.014 (-0.008, 0.036)        | .201    |
| April 27 – May 9, 2022                                                      | 0.022 (0.001, 0.043)         | .040    |
| June 1 – June 13, 2022                                                      | 0.022 (0.005, 0.040)         | .013    |
| June 29 – July 11, 2022                                                     | 0.032 (0.019, 0.046)         | <.001   |

| Alternative model 2: pre-period shortened to period before federal eviction moratorium and enhanced unemployment benefit expiration           |                        |       |
|-----------------------------------------------------------------------------------------------------------------------------------------------|------------------------|-------|
| September 29 – October 10, 2021                                                                                                               | -0.005 (-0.022, 0.013) | .607  |
| December 1 – December 13, 2021                                                                                                                | -0.004 (-0.020, 0.013) | .673  |
| December 29, 2021 – January 10, 2022                                                                                                          | 0 [reference]          | NA    |
| January 26 – February 7, 2022                                                                                                                 | 0.015 (-0.001, 0.032)  | .065  |
| March 2 – March 14, 2022                                                                                                                      | 0.013 (-0.003, 0.029)  | .111  |
| March 30 – April 11, 2022                                                                                                                     | 0.015 (-0.003, 0.033)  | .110  |
| April 27 – May 9, 2022                                                                                                                        | 0.022 (0.004, 0.040)   | .015  |
| June 1 – June 13, 2022                                                                                                                        | 0.023 (0.004, 0.041)   | .016  |
| June 29 – July 11, 2022                                                                                                                       | 0.033 (0.015, 0.050)   | <.001 |
| Alternative model 3: controlling for interaction between presence of children in household and unemployment insurance                         |                        |       |
| July 21 – August 2, 2021                                                                                                                      | -0.006 (-0.022, 0.011) | .485  |
| August 4 – August 16, 2021                                                                                                                    | -0.005 (-0.021, 0.011) | .525  |
| August 18 – August 30, 2021                                                                                                                   | 0.007 (-0.009, 0.023)  | .410  |
| September 1 – September 13, 2021                                                                                                              | -0.002 (-0.018, 0.015) | .854  |
| September 15 – September 27, 2021                                                                                                             | -0.002 (-0.020, 0.015) | .792  |
| September 29 – October 10, 2021                                                                                                               | -0.004 (-0.022, 0.013) | .621  |
| December 1 – December 13, 2021                                                                                                                | -0.004 (-0.020, 0.013) | .675  |
| December 29, 2021 – January 10, 2022                                                                                                          | 0 [reference]          | NA    |
| January 26 – February 7, 2022                                                                                                                 | 0.015 (-0.001, 0.032)  | .065  |
| March 2 – March 14, 2022                                                                                                                      | 0.013 (-0.003, 0.028)  | .116  |
| March 30 – April 11, 2022                                                                                                                     | 0.014 (-0.004, 0.032)  | .124  |
| April 27 – May 9, 2022                                                                                                                        | 0.022 (0.004, 0.040)   | .018  |
| June 1 – June 13, 2022                                                                                                                        | 0.022 (0.004, 0.041)   | .017  |
| June 29 – July 11, 2022                                                                                                                       | 0.032 (0.014, 0.050)   | <.001 |
| Alternative model 4: fully saturated, controlling for interaction between presence of children in household and all other included covariates |                        |       |
| July 21 – August 2, 2021                                                                                                                      | -0.006 (-0.023, 0.010) | .461  |
| August 4 – August 16, 2021                                                                                                                    | -0.005 (-0.021, 0.011) | .503  |
| August 18 – August 30, 2021                                                                                                                   | 0.006 (-0.010, 0.022)  | .479  |
| September 1 – September 13, 2021                                                                                                              | -0.002 (-0.019, 0.014) | .777  |
| September 15 – September 27, 2021                                                                                                             | -0.003 (-0.021, 0.014) | .696  |
| September 29 – October 10, 2021                                                                                                               | -0.005 (-0.022, 0.012) | .571  |
| December 1 – December 13, 2021                                                                                                                | -0.003 (-0.020, 0.014) | .720  |
| December 29, 2021 – January 10, 2022                                                                                                          | 0 [reference]          | NA    |
| January 26 – February 7, 2022                                                                                                                 | 0.015 (-0.001, 0.032)  | .065  |

|                           |                       |       |
|---------------------------|-----------------------|-------|
| March 2 – March 14, 2022  | 0.013 (-0.003, 0.028) | .117  |
| March 30 – April 11, 2022 | 0.014 (-0.004, 0.032) | .117  |
| April 27 – May 9, 2022    | 0.021 (0.003, 0.039)  | .020  |
| June 1 – June 13, 2022    | 0.022 (0.004, 0.040)  | .017  |
| June 29 – July 11, 2022   | 0.032 (0.014, 0.049)  | <.001 |

Table reports coefficient of interest: the interaction between having children in the household and survey wave. Full model results are not presented. Each model controls for the same covariates included in the main model: age, sex at birth, race/ethnicity, education level, number of adults in household, number of children in household, annual household income, employment in last 7 days, use of unemployment insurance for spending/funds, use of Economic Impact Payments for spending/funds, Supplemental Nutrition Assistance Program participation, receipt of food aid, health insurance coverage, and state fixed effects
